# Supplementary material for: Bifidobacterium alters the gut microbiota and modulates the functional metabolism of T regulatory cells in the context of immune checkpoint blockade
Source: PubMed Central journal article supplement — Proc Natl Acad Sci U S A. 2020 Oct 19;117(44):27509–15. doi: 10.1073/pnas.1921223117 (PMC7959554; doi:10.1073/pnas.1921223117), 2020-10-19
Supplement: pnas.1921223117.sapp.pdf [file pnas.1921223117.sapp.pdf]

### Supplementary material:

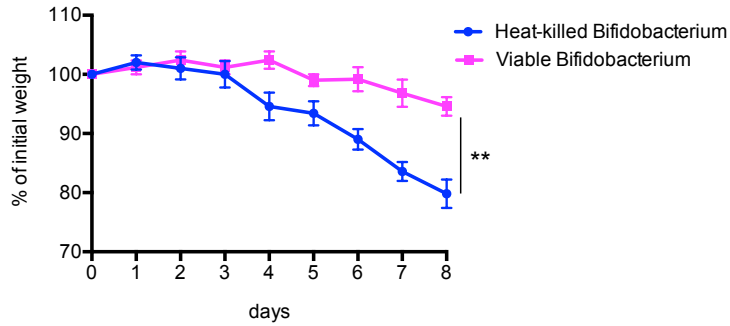

Figure S1 Live *Bifidobacterium* ameliorates gut inflammation.

Percent initial weight of mice with 2.5% DSS-induced colitis injected with an  $\alpha$ CTLA-4 mAb and treated with viable *Bifidobacterium* and Heat-killed control. The data are represented as the mean  $\pm$  SEM (n=5, \*\* p<0.01).

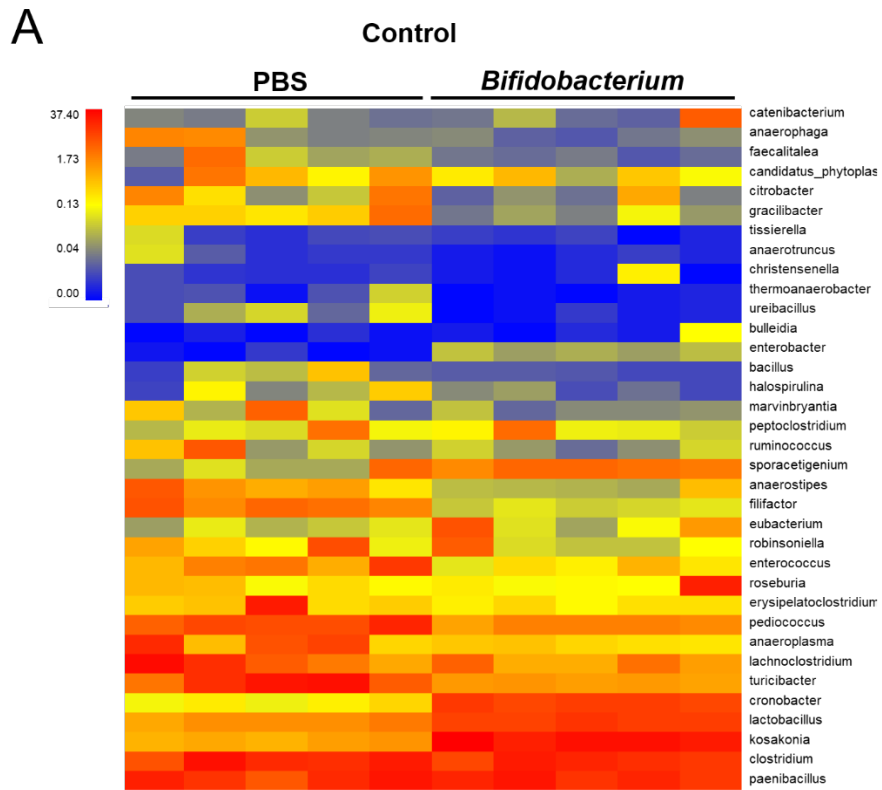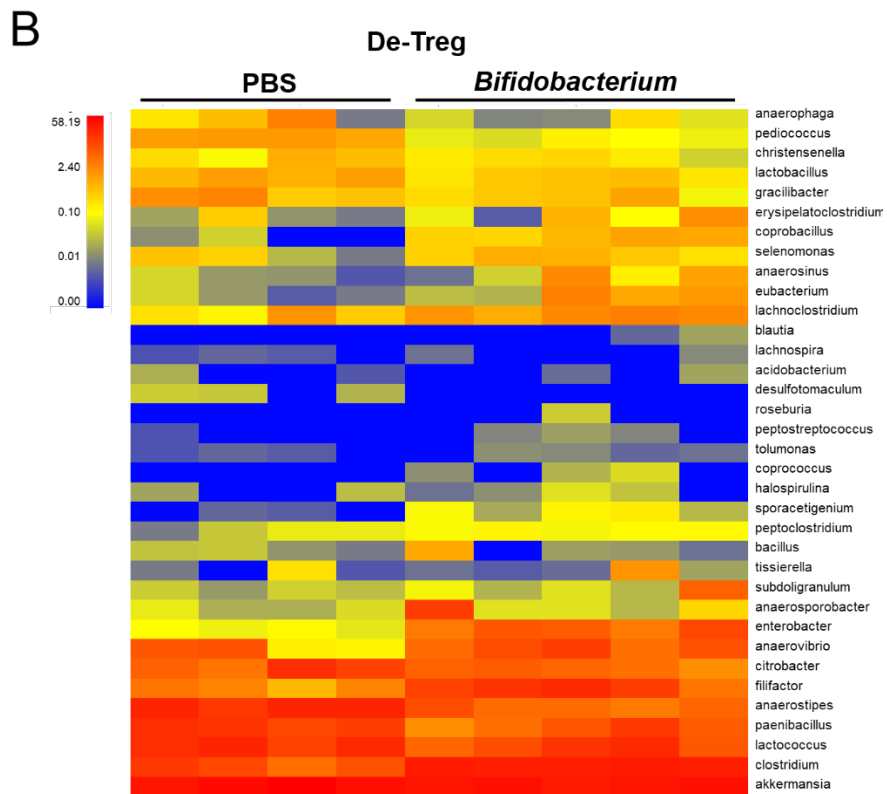

Figure S2.

Heatmap of 16S rRNA sequencing results from PBS or Bifidobacterium-treated control mice (A) and De-Treg mice (B).

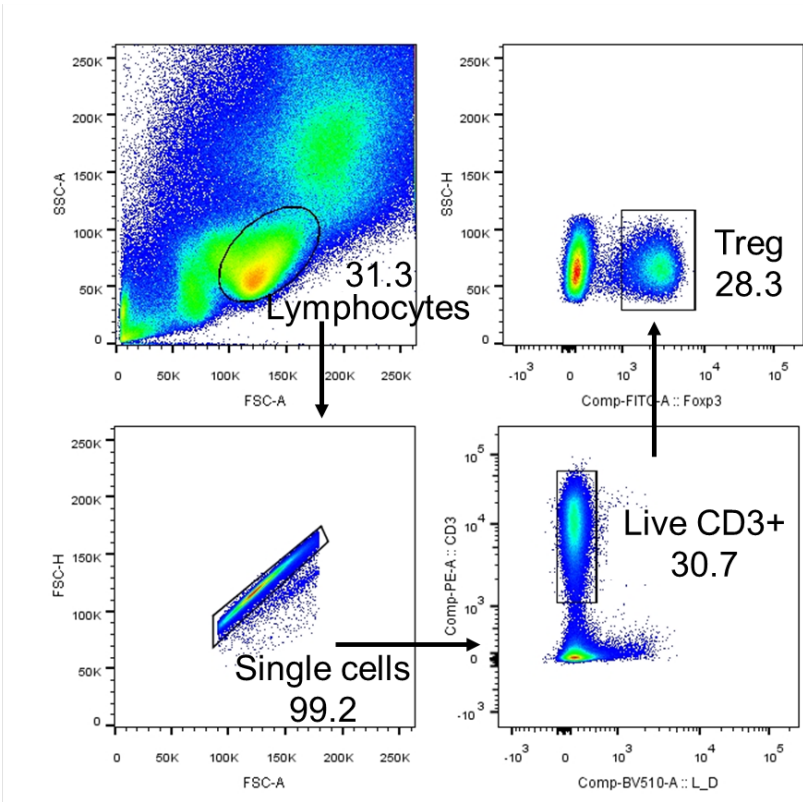

Figure S3.  
Gating strategy of colon LP Treg cells.

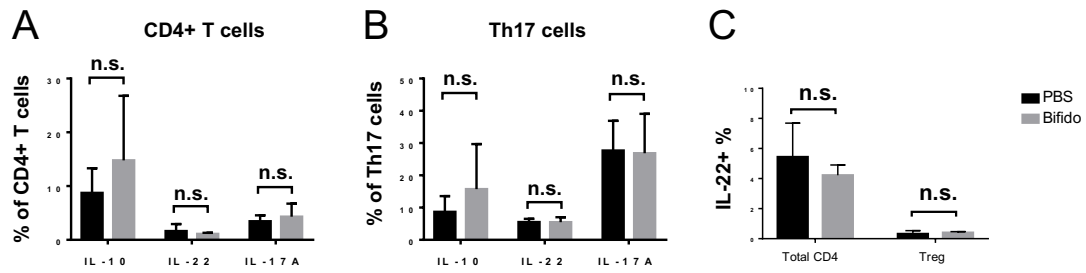

Figure S4.

Flow cytometry results of IL-10, IL-22 and IL-17A in colon LP total CD4+ T cells, Th17 and Treg cells from mice treated with PBS or *Bifidobacterium* (n.s. not significant).
